# Supplementary material for: First Report of Aleurocanthus spiniferus on Ailanthus altissima: Profiling of the Insect Microbiome and MicroRNAs
Source: MDPI journal article supplement (doi:10.3390/insects11030161), 2020-03-03
Supplement: s1 [file s1]

**Table S4.** Overview of the isomiRs associated with the miRNAs of *Aleurocanthus spiniferus*.

| miRNA name      | Feature                         | Example of perfect Match with miRBase miRNAs | miRNA/isomiR ID         | Sequence                  | RPM      | IsomiR diversity index | IsomiR abundance index |
|-----------------|---------------------------------|----------------------------------------------|-------------------------|---------------------------|----------|------------------------|------------------------|
| asp-bantam-3p   | Mature miRNA                    |                                              | NW_017547202.1_5067     | TGAGATCATCGTGAAAGCTG      | 33,695.0 | 0.02                   | 2.43                   |
|                 | Most abundant isomiR            |                                              | NW_017547202.1_5067.1   | GAGATCATCGTGAAAGCTGA      | 2,054.2  |                        |                        |
|                 | isomiRs matching miRBase miRNAs | pca-bantam-3p                                | NW_017547202.1_5067.293 | TGAGATCATTGTGAAAGCTGAT    | 12.7     |                        |                        |
|                 | Other isomiRs (606)             |                                              |                         |                           | 79,930.3 |                        |                        |
| asp-miR-276a-3p | Mature miRNA                    | aae-miR-276-3p                               | NW_017547107.1_1308     | TAGGAACTTCATACCGTGCTC     | 10,088.2 | 0.03                   | 0.77                   |
|                 | Most abundant isomiR            |                                              | NW_017547107.1_1308.1   | AGGAACTTCATACCGTGCTCT     | 27.5     |                        |                        |
|                 | isomiRs matching miRBase miRNAs | dme-miR-276a-3p                              | NW_017547107.1_1308.7   | TAGGAACTTCATACCGTGCTCT    | 342.6    |                        |                        |
|                 |                                 | isc-miR-276                                  | NW_017547107.1_1308.160 | TAGGAACTTCATACCATGCTC     | 4.4      |                        |                        |
| asp-miR-317-3p  | Other isomiRs (252)             |                                              |                         |                           | 7,362.8  | 0.29                   | 3.81                   |
|                 | Mature miRNA                    | dqu-miR-317-3p                               | NW_017550575.1_11879    | TGAACACAGCTGGTGGTATCTCAG  | 811.3    |                        |                        |
|                 | Most abundant isomiR            |                                              | NW_017550575.1_11879.1  | GAACACAGCTGGTGGTATCTCAGC  | 8.2      |                        |                        |
|                 | isomiRs matching miRBase miRNAs | ame-miR-317-3p                               | NW_017550575.1_11879.45 | TGAACACAGCTGGTGGTATCTCAGT | 8.4      |                        |                        |
| asp-miR-2765-5p |                                 | api-miR-317                                  | NW_017550575.1_11879.5  | TGAACACAGCTGGTGGTATCT     | 233.3    | 0.12                   | 1.70                   |
|                 |                                 | mse-miR-317                                  | NW_017550575.1_11879.4  | TGAACACAGCTGGTGGTATCTCA   | 331.5    |                        |                        |
|                 | Other isomiRs (234)             |                                              |                         |                           | 2,509.4  |                        |                        |
|                 | Mature miRNA                    |                                              | NW_017547098.1_410      | TGGTAACTCCACACCACCGTTGG   | 1,212.5  |                        |                        |
| asp-miR-750-3p  | Most abundant isomiR            |                                              | NW_017547098.1_410.1    | GGTAACTCCACACCACCGTTGGC   | 15.6     | 0.10                   | 0.88                   |
|                 | isomiRs matching miRBase miRNAs | ame-miR-2765-5p                              | NW_017547098.1_412.2    | TGGTAACTCCACACCACCGTTGGC  | 143.1    |                        |                        |
|                 | Other isomiRs (186)             |                                              |                         |                           | 2,269.3  |                        |                        |
|                 | Mature miRNA                    | ame-miR-750-3p                               | NW_017547443.1_8884     | CCAGATCTAACTCTTCCAGCTC    | 1,210.5  |                        |                        |
| asp-miR-184-3p  | Most abundant isomiR            |                                              | NW_017547443.1_8884.1   | CAGATCTAACTCTTCCAGCTCT    | 2.0      | 0.16                   | 2.30                   |
|                 | Other isomiRs (150)             |                                              |                         |                           | 2,060.2  |                        |                        |
|                 | Mature miRNA                    | aga-miR-184                                  | NW_017547113.1_1681     | TGGACGGAGAACTGATAAGGG     | 905.5    |                        |                        |
|                 | Most abundant isomiR            |                                              | NW_017547113.1_1681.1   | GGACGGAGAACTGATAAGGGC     | 18.6     |                        |                        |
| asp-miR-8-3p    | isomiRs matching miRBase miRNAs | dme-miR-184-3p                               | NW_017547113.1_1681.4   | TGGACGGAGAACTGATAAGGGC    | 263.1    | 0.07                   | 0.89                   |
|                 |                                 | dqu-miR-184-3p                               | NW_017547113.1_1681.2   | TGGACGGAGAACTGATAAGG      | 418.6    |                        |                        |
|                 |                                 | gga-miR-184-3p                               | NW_017547113.1_1681.27  | TGGACGGAGAACTGATAAGGGT    | 14.0     |                        |                        |
|                 | Other isomiRs (140)             |                                              |                         |                           | 1,414.3  |                        |                        |
| asp-miR-100-5p  | Mature miRNA                    |                                              | NW_017547115.1_2104     | TAATACTGTCAGGTAATGAT      | 1,606.1  | 0.09                   | 0.88                   |
|                 | Most abundant isomiR            |                                              | NW_017547115.1_2104.1   | AATACTGTCAGGTAATGATG      | 7.8      |                        |                        |
|                 | isomiRs matching miRBase miRNAs | api-miR-8                                    | NW_017547115.1_2104.75  | TAATACTGTCAGGTAATGATGTC   | 2.7      |                        |                        |
|                 |                                 | cqu-miR-8-3p                                 | NW_017547115.1_2104.42  | TAATACTGTCAGGTAAAGATGT    | 5.5      |                        |                        |
| asp-miR-13a-3p  | Other isomiRs (115)             |                                              |                         |                           | 1,409.8  | 0.08                   | 0.69                   |
|                 | Mature miRNA                    | tgu-miR-100-5p                               | NW_017547299.1_7860     | AACCCGTAGATCCGAACCTTGT    | 904.4    |                        |                        |
|                 | Most abundant isomiR            |                                              | NW_017547299.1_7860.1   | ACCCGTAGATCCGAACCTTGTG    | 4.7      |                        |                        |
|                 | isomiRs matching miRBase miRNAs | ame-miR-100-5p                               | NW_017547299.1_7860.5   | AACCCGTAGATCCGAACCTTGTG   | 43.5     |                        |                        |
| asp-miR-2a-3p   |                                 | ola-miR-100                                  | NW_017547299.1_7860.3   | AACCCGTAGATCCGAACCTT      | 128.2    | 0.64                   | 4.43                   |
|                 | Other isomiRs (77)              |                                              |                         |                           | 622.0    |                        |                        |
|                 | Mature miRNA                    |                                              | NW_017547352.1_8563     | TATCACAGCCACTTTGATGAAC    | 926.6    |                        |                        |
|                 | Most abundant isomiR            |                                              | NW_017547352.1_8563.1   | ATCACAGCCACTTTGATGAACT    | 1.5      |                        |                        |
| asp-miR-2a-3p   | Other isomiRs (71)              |                                              |                         |                           | 634.8    | 0.64                   | 4.43                   |
|                 | Mature miRNA                    | mse-miR-2a                                   | NW_017547352.1_8561     | TCACAGCCAGCTTTGATGAGCA    | 155.7    |                        |                        |
| asp-miR-2a-3p   | isomiRs matching miRBase miRNAs | api-miR-2a                                   | NW_017561640.1_15257.6  | TATCACAGCCAGCTTTGATGAGCG  | 39.5     |                        |                        |

| miRNA name      | Feature                         | Example of perfect Match with miRBase miRNAs | miRNA/isomiR ID         | Sequence                 | RPM     | IsomiR diversity index | IsomiR abundance index |
|-----------------|---------------------------------|----------------------------------------------|-------------------------|--------------------------|---------|------------------------|------------------------|
|                 |                                 | dme-miR-2a-3p                                | NW_017547352.1_8561.6   | TATCACAGCCAGCTTTGATGAGC  | 54.0    |                        |                        |
|                 |                                 | mse-miR-2b                                   | NW_017547352.1_8561.7   | TCACAGCCAGCTTTGATGAGC    | 49.6    |                        |                        |
|                 |                                 | pte-miR-2g-3p                                | NW_017547352.1_8561.1   | TATCACAGCCAGCTTTGATGAG   | 47.8    |                        |                        |
|                 |                                 | pxy-miR-2b                                   | NW_017547352.1_8561.4   | TCACAGCCAGCTTTGATGAGCAC  | 155.3   |                        |                        |
|                 |                                 | Other isomiRs (173)                          |                         |                          | 1,029.3 |                        |                        |
| asp-miR-315-5p  | Mature miRNA                    | dme-miR-315-5p                               | NW_017547334.1_8451     | TTTTGATTGTTGCTCAGAAAGC   | 447.9   | 0.21                   | 2.18                   |
|                 | Most abundant isomiR            |                                              | NW_017547334.1_8451.1   | TTTGATTGTTGCTCAGAAAGCC   | 36.0    |                        |                        |
|                 | isomiRs matching miRBase miRNAs | dqu-miR-315-5p                               | NW_017547334.1_8451.42  | TTTTGATTGTTGCTCAGAAAGCCT | 3.3     |                        |                        |
|                 |                                 | dvi-miR-315a                                 | NW_017547334.1_8451.2   | TTTTGATTGTTGCTCAGAAAGCC  | 336.8   |                        |                        |
|                 |                                 | isc-miR-315                                  | NW_017547334.1_8451.96  | TTTTGATTGTTGCTCAGAAAGGC  | 1.1     |                        |                        |
|                 |                                 | ske-miR-315                                  | NW_017547334.1_8451.3   | TTTTGATTGTTGCTCAGAAAG    | 97.1    |                        |                        |
|                 | Other isomiRs (90)              |                                              |                         |                          | 504.0   |                        |                        |
| asp-miR-9a-5p   | Mature miRNA                    |                                              | NW_017551177.1_12283    | TCTTTGGTTACCTAGCTGTATG   | 506.8   | 0.17                   | 1.63                   |
|                 | Most abundant isomiR            |                                              | NW_017551177.1_12283.1  | CTTTGGTTACCTAGCTGTATGA   | 4.4     |                        |                        |
|                 | isomiRs matching miRBase miRNAs | aca-miR-9-5p                                 | NW_017551177.1_12283.56 | TCTTTGGTTATCTAGCTGTA     | 2.2     |                        |                        |
|                 |                                 | ppc-miR-9                                    | NW_017551177.1_12283.36 | TCTTTGGTTATCTAGCTGTATG   | 4.6     |                        |                        |
|                 |                                 | tca-miR-9a-5p                                | NW_017551177.1_12283.44 | TCTTTGGTTATCTAGCTGTAT    | 3.5     |                        |                        |
|                 |                                 | xtr-miR-9b-5p                                | NW_017551177.1_12283.5  | TCTTTGGTTACCTAGCTGTATGA  | 40.9    |                        |                        |
|                 | Other isomiRs (79)              |                                              |                         |                          | 772.6   |                        |                        |
| asp-miR-277-3p  | Mature miRNA                    | aae-miR-277-3p                               | NW_017550575.1_11881    | TAAATGCACTATCTGGTACGAC   | 486.2   | 0.12                   | 1.09                   |
|                 | Most abundant isomiR            |                                              | NW_017550575.1_11881.1  | TAAATGCACTATCTGGTACGA    | 190.4   |                        |                        |
|                 | isomiRs matching miRBase miRNAs | dme-miR-277-3p                               | NW_017550575.1_11881.44 | TAAATGCACTATCTGGTACGACA  | 1.6     |                        |                        |
|                 | Other isomiRs (57)              |                                              |                         |                          | 337.6   |                        |                        |
| asp-miR-71-3p   | Mature miRNA                    |                                              | NW_017547352.1_8559     | TCTCACTACCTTGCTTTTCAT    | 520.4   | 0.09                   | 0.58                   |
|                 | Most abundant isomiR            |                                              | NW_017547352.1_8559.1   | CTCACTACCTTGCTTTTCATG    | 2.6     |                        |                        |
|                 | isomiRs matching miRBase miRNAs | tca-miR-71-3p                                | NW_017547352.1_8559.7   | TCTCACTACCTTGCTTTTCATG   | 17.5    |                        |                        |
|                 | Other isomiRs (43)              |                                              |                         |                          | 283.3   |                        |                        |
| asp-miR-14-3p   | Mature miRNA                    | dan-miR-14                                   | NW_017547098.1_493      | TCAGTCTTTTTCTCTCTCCTA    | 371.1   | 0.12                   | 1.16                   |
|                 | Most abundant isomiR            |                                              | NW_017547098.1_493.1    | CAGTCTTTTTCTCTCTCCTAT    | 2.2     |                        |                        |
|                 | isomiRs matching miRBase miRNAs | dme-miR-14-3p                                | NW_017547098.1_493.4    | TCAGTCTTTTTCTCTCTCCTAT   | 53.3    |                        |                        |
|                 | Other isomiRs (44)              |                                              |                         |                          | 376.6   |                        |                        |
| asp-miR-275-3p  | Mature miRNA                    | api-miR-275                                  | NW_017547297.1_7629     | TCAGGTACCTGAAGTAGCGCG    | 276.4   | 0.20                   | 1.80                   |
|                 | Most abundant isomiR            |                                              | NW_017547297.1_7629.1   | CAGGTACCTGAAGTAGCGCGC    | 4.4     |                        |                        |
|                 | isomiRs matching miRBase miRNAs | aae-miR-275-3p                               | NW_017547297.1_7629.3   | TCAGGTACCTGAAGTAGCGC     | 88.2    |                        |                        |
|                 |                                 | dme-miR-275-3p                               | NW_017547297.1_7629.5   | TCAGGTACCTGAAGTAGCGCGCG  | 35.1    |                        |                        |
|                 |                                 | tcf-miR-275                                  | NW_017547297.1_7629.2   | TCAGGTACCTGAAGTAGCGCGC   | 134.0   |                        |                        |
|                 | Other isomiRs (51)              |                                              |                         |                          | 234.9   |                        |                        |
| asp-let-7-5p    | Mature miRNA                    | tca-let-7-5p                                 | NW_017547299.1_7862     | TGAGGTAGTAGGTTGTATAG     | 257.8   | 0.19                   | 1.70                   |
|                 | Most abundant isomiR            |                                              | NW_017547299.1_7862.1   | GAGGTAGTAGGTTGTATAGT     | 13.1    |                        |                        |
|                 | isomiRs matching miRBase miRNAs | dme-let-7-5p                                 | NW_017547299.1_7862.3   | TGAGGTAGTAGGTTGTATAGT    | 153.7   |                        |                        |
|                 |                                 | hme-let-7                                    | NW_017547299.1_7862.5   | TGAGGTAGTAGGTTGTATAGTA   | 38.7    |                        |                        |
|                 |                                 | pte-let-7-5p                                 | NW_017547299.1_7862.17  | TGAGGTAGTAGGTTGTATAGTT   | 4.0     |                        |                        |
|                 | Other isomiRs (45)              |                                              |                         |                          | 227.8   |                        |                        |
| asp-miR-263a-5p | Mature miRNA                    |                                              | NW_017547161.1_3192     | AATGGCACTAGAAGAATTCACG   | 173.5   | 0.41                   | 2.72                   |
|                 | Most abundant isomiR            |                                              | NW_017547161.1_3192.1   | ATGGCACTAGAAGAATTCACGG   | 7.5     |                        |                        |
|                 | isomiRs matching miRBase miRNAs | aae-miR-263a-5p                              | NW_017557870.1_14945.2  | AATGGCACTGGAAGAATTCACGG  | 4.4     |                        |                        |

| miRNA name     | Feature                         | Example of perfect Match with miRBase miRNAs | miRNA/isomiR ID         | Sequence                 | RPM   | IsomiR diversity index | IsomiR abundance index |
|----------------|---------------------------------|----------------------------------------------|-------------------------|--------------------------|-------|------------------------|------------------------|
|                |                                 | bmo-miR-263a-5p                              | NW_017557870.1_14945.1  | AATGGCACTGGAAGAATTCAC    | 8.6   |                        |                        |
|                |                                 | dme-miR-263a-5p                              | NW_017557870.1_14945.5  | AATGGCACTGGAAGAATTCACGGG | 2.7   |                        |                        |
|                |                                 | tur-miR-263a-5p                              | NW_017557870.1_14945.4  | TATGGCACTGGAAGAATTCACG   | 3.5   |                        |                        |
|                |                                 | Other isomiRs (71)                           |                         |                          | 488.8 |                        |                        |
| asp-miR-31-5p  | Mature miRNA                    |                                              | NW_017547107.1_1345     | AGGCAAGAUGUUGGCAUAGC     | 450.0 | 0.20                   | 2.16                   |
|                | Most abundant isomiR            | aca-miR-31-5p                                | NW_017547107.1_1345.1   | AGGCAAGAUGUUGGCAUAGCC    | 30.0  |                        |                        |
|                | Other isomiRs (90)              |                                              |                         |                          | 174.4 |                        |                        |
| asp-miR-306-5p | Mature miRNA                    |                                              | NW_017547320.1_8138     | TCAGGTACTGAGTGA CTCTG    | 192.9 | 0.24                   | 1.88                   |
|                | Most abundant isomiR            |                                              | NW_017547320.1_8138.1   | CAGGTACTGAGTGA CTCTGA    | 3.5   |                        |                        |
|                | isomiRs matching miRBase miRNAs | ame-miR-306-5p                               | NW_017547320.1_8138.3   | TCAGGTACTGAGTGA CTCTGAG  | 118.4 |                        |                        |
|                |                                 | dqu-miR-306-5p                               | NW_017547320.1_8138.4   | TCAGGTACTGAGTGA CTCTGA   | 54.0  |                        |                        |
|                | Other isomiRs (44)              |                                              |                         |                          | 186.2 |                        |                        |
| asp-miR-92b-3p | Mature miRNA                    |                                              | NW_017564582.1_15992    | AAUUGCACUAGUCCCGGCCUG    | 150.0 | 0.04                   | 2.26                   |
|                | isomiRs matching miRBase miRNAs | dme-miR-92b-3p                               | NW_017564582.1_15992.1  | AAUUGCACUAGUCCCGGCCUGC   | 16.2  |                        |                        |
|                | Other isomiRs (6)               |                                              |                         |                          | 322.2 |                        |                        |
| asp-miR-305-5p | Mature miRNA                    | dvi-miR-305-5p                               | NW_017547297.1_7632     | ATTGTACTTCATCAGGTGCTC    | 99.1  | 0.60                   | 3.67                   |
|                | Most abundant isomiR            |                                              | NW_017547297.1_7632.1   | TTGTACTTCATCAGGTGCTCT    | 3.5   |                        |                        |
|                | isomiRs matching miRBase miRNAs | aae-miR-305-5p                               | NW_017547297.1_7632.6   | ATTGTACTTCATCAGGTGCTCTGG | 21.6  |                        |                        |
|                |                                 | cqu-miR-305-5p                               | NW_017547297.1_7632.7   | ATTGTACTTCATCAGGTGCTCT   | 21.6  |                        |                        |
|                |                                 | dme-miR-305-5p                               | NW_017547297.1_7632.4   | ATTGTACTTCATCAGGTGCTCTG  | 91.8  |                        |                        |
|                |                                 | pca-miR-305-5p                               | NW_017547297.1_7632.5   | ATTGTACTTCATCAGGTGCT     | 39.1  |                        |                        |
|                | Other isomiRs (54)              |                                              |                         |                          | 185.7 |                        |                        |
| asp-miR-87a-3p | Mature miRNA                    |                                              | NW_017547298.1_7719     | GTGAGCAACGTATCAGGTGTC    | 61.1  | 0.13                   | 0.47                   |
|                | Most abundant isomiR            |                                              | NW_017547298.1_7719.1   | AGCAACGTATCAGGTGTC       | 1.1   |                        |                        |
|                | isomiRs matching miRBase miRNAs | ame-miR-87-3p                                | NW_017547298.1_7717.5   | GTGAGCAAAGTTTCAGGTGT     | 3.8   |                        |                        |
|                |                                 | dqu-miR-87-3p                                | NW_017547298.1_7717.9   | GTGAGCAAAGTTTCAGGTGTGT   | 1.8   |                        |                        |
|                | Other isomiRs (27)              |                                              |                         |                          | 286.9 |                        |                        |
| asp-miR-13b-3p | Mature miRNA                    |                                              | NW_017561640.1_15253    | TATCACAGCCATTTT GACGTGCC | 80.0  | 0.54                   | 2.41                   |
|                | Most abundant isomiR            |                                              | NW_017561640.1_15253.1  | TATCACAGCCATTTT GACGTGC  | 50.2  |                        |                        |
|                | Other isomiRs (42)              |                                              |                         |                          | 142.4 |                        |                        |
| asp-miR-34-5p  | Mature miRNA                    | bmo-miR-34-5p                                | NW_017550575.1_11884    | TGGCAGTGTGGTTAGCTGGTTG   | 66.2  | 0.42                   | 2.77                   |
|                | Most abundant isomiR            |                                              | NW_017550575.1_11884.1  | GGCAGTGTGGTTAGCTGGTTGT   | 4.4   |                        |                        |
|                | isomiRs matching miRBase miRNAs | aga-miR-34                                   | NW_017550575.1_11884.3  | TGGCAGTGTGGTTAGCTGGT     | 43.6  |                        |                        |
|                |                                 | ame-miR-34-5p                                | NW_017550575.1_11884.35 | TGGCAGTGTGGTTAGCTGGTTG   | 0.9   |                        |                        |
|                |                                 | dme-miR-34-5p                                | NW_017550575.1_11884.6  | TGGCAGTGTGGTTAGCTGGTTGTG | 7.3   |                        |                        |
|                |                                 | dvi-miR-34-5p                                | NW_017550575.1_11884.2  | TGGCAGTGTGGTTAGCTGGTT    | 43.8  |                        |                        |
|                |                                 | mse-miR-34                                   | NW_017550575.1_11884.4  | TGGCAGTGTGGTTAGCTGGTTGT  | 32.4  |                        |                        |
|                |                                 | ngi-miR-34                                   | NW_017550575.1_11884.9  | GGCAGTGTGGTTAGCTGGTTG    | 4.6   |                        |                        |
|                | Other isomiRs (21)              |                                              |                         |                          | 46.4  |                        |                        |
|                | Mature miRNA                    |                                              | NW_017547290.1_7299     | GAAGCTCGTCTCTACAGGTATC   | 152.6 | 0.18                   | 0.63                   |
| asp-miR-993-3p | Most abundant isomiR            |                                              | NW_017547290.1_7299.1   | GAAGCTCGTCTCTACAGGTAT    | 31.6  |                        |                        |
|                | isomiRs matching miRBase miRNAs | dme-miR-993-3p                               | NW_017547290.1_7299.6   | GAAGCTCGTCTCTACAGGTATCT  | 4.7   |                        |                        |
|                | Other isomiRs (25)              |                                              |                         |                          | 59.8  |                        |                        |
| asp-miR-125-5p | Mature miRNA                    |                                              | NW_017547299.1_7864     | TCCCTGAGACCCTAATTTGTG    | 142.0 | 0.13                   | 0.72                   |
|                | Most abundant isomiR            |                                              | NW_017547299.1_7864.1   | CCCTGAGACCCTAATTTGTGA    | 1.1   |                        |                        |
|                | Other isomiRs (17)              |                                              |                         |                          | 101.7 |                        |                        |

| miRNA name       | Feature                         | Example of perfect Match with miRBase miRNAs | miRNA/isomiR ID         | Sequence                 | RPM   | IsomiR diversity index | IsomiR abundance index |
|------------------|---------------------------------|----------------------------------------------|-------------------------|--------------------------|-------|------------------------|------------------------|
| asp-miR-927-3p   | Mature miRNA                    |                                              | NW_017547282.1_7013     | CAAAAGCGTTTGAATTCTGGAA   | 145.8 | 0.10                   | 0.42                   |
|                  | Most abundant isomiR            |                                              | NW_017547282.1_7013.1   | CAAAAGCGTTTGAATTCTGGAAC  | 17.5  |                        |                        |
|                  | Other isomiRs (13)              |                                              |                         |                          | 43.3  |                        |                        |
| asp-miR-281-2-5p | Mature miRNA                    |                                              | NW_017561619.1_15248    | AAGAGAGCTATCCTTCGACAG    | 71.6  | 0.38                   | 1.64                   |
|                  | Most abundant isomiR            |                                              | NW_017561619.1_15248.1  | AGAGAGCTATCCTTCGACAGT    | 7.3   |                        |                        |
|                  | isomiRs matching miRBase miRNAs | aae-miR-281-5p                               | NW_017561619.1_15248.15 | AAGAGAGCTATCCGTCGAC      | 2.7   |                        |                        |
|                  |                                 | dme-miR-281-2-5p                             | NW_017561619.1_15248.3  | AAGAGAGCTATCCGTCGACAGT   | 14.0  |                        |                        |
|                  | Other isomiRs (24)              |                                              |                         |                          | 93.6  |                        |                        |
| asp-miR-252a-5p  | Mature miRNA                    |                                              | NW_017554870.1_13884    | CTAAGTACTCCGTGCCGCAGG    | 70.6  | 0.30                   | 1.63                   |
|                  | Most abundant isomiR            |                                              | NW_017554870.1_13884.1  | TAAGTACTCCGTGCCGCAGGA    | 7.5   |                        |                        |
|                  | Other isomiRs (20)              |                                              |                         |                          | 107.6 |                        |                        |
| asp-miR-1-3p     | Mature miRNA                    |                                              | NW_017547904.1_9568     | TGGAATGTAAAGAAGTATGGA    | 62.0  | 0.26                   | 0.87                   |
|                  | Most abundant isomiR            |                                              | NW_017547904.1_9568.1   | TGGAATGTAAAGAAGTATGG     | 10.7  |                        |                        |
|                  | isomiRs matching miRBase miRNAs | cbr-miR-1                                    | NW_017547904.1_9568.18  | TGGAATGTAAAGAAGTATGTA    | 1.1   |                        |                        |
|                  |                                 | dme-miR-1-3p                                 | NW_017547904.1_9568.4   | TGGAATGTAAAGAAGTATGGAG   | 6.7   |                        |                        |
|                  | Other isomiRs (13)              |                                              |                         |                          | 35.6  |                        |                        |
| asp-miR-190-5p   | Mature miRNA                    | bmo-miR-190-5p                               | NW_017547096.1_359      | AGATATGTTTGATATTCTTGTT   | 42.9  | 0.33                   | 1.18                   |
|                  | Most abundant isomiR            |                                              | NW_017547096.1_359.1    | GATATGTTTGATATTCTTGTTG   | 1.1   |                        |                        |
|                  | isomiRs matching miRBase miRNAs | dme-miR-190-5p                               | NW_017547096.1_359.3    | AGATATGTTTGATATTCTTGTTG  | 10.2  |                        |                        |
|                  |                                 | hme-miR-190                                  | NW_017547096.1_359.2    | AGATATGTTTGATATTCTTGTT   | 10.9  |                        |                        |
|                  |                                 | tca-miR-190-5p                               | NW_017547096.1_359.6    | AGATATGTTTGATATTCTTG     | 3.8   |                        |                        |
|                  | Other isomiRs (10)              |                                              |                         |                          | 24.7  |                        |                        |
| asp-miR-133-3p   | Mature miRNA                    | cin-miR-133-3p                               | NW_017547904.1_9564     | TTGGTCCCCTTCAACCAGCTG    | 35.6  | 0.22                   | 0.93                   |
|                  | isomiRs matching miRBase miRNAs | dme-miR-133-3p                               | NW_017547904.1_9564.4   | TTGGTCCCCTTCAACCAGCTGT   | 3.5   |                        |                        |
|                  |                                 | pal-miR-133b-3p                              | NW_017547904.1_9564.1   | TTGGTCCCCTTCAACCAGCT     | 14.6  |                        |                        |
|                  | Other isomiRs (6)               |                                              |                         |                          | 15.1  |                        |                        |
| asp-miR-92a-3p   | Mature miRNA                    |                                              | NW_017564582.1_15994    | TATTGCACTTGTCCTCGGCC     | 21.5  | 0.51                   | 2.13                   |
|                  | isomiRs matching miRBase miRNAs | aae-miR-92a-3p                               | NW_017564582.1_15994.1  | TATTGCACTTGTCCTCGCCTA    | 16.2  |                        |                        |
|                  |                                 | aga-miR-92a                                  | NW_017564582.1_15994.3  | TATTGCACTTGTCCTCGCCTAT   | 3.3   |                        |                        |
|                  |                                 | bma-miR-92                                   | NW_017564582.1_15994.5  | TATTGCACTCGTCCCGGCCCT    | 2.6   |                        |                        |
|                  |                                 | cpi-miR-92a-3p                               | NW_017564582.1_15994.2  | TATTGCACTTGTCCTCGGCCCT   | 11.3  |                        |                        |
|                  |                                 | sha-miR-92a                                  | NW_017564582.1_15994.4  | TATTGCACTTGTCCTCGGC      | 2.7   |                        |                        |
|                  | Other isomiRs (6)               |                                              |                         |                          | 9.6   |                        |                        |
| asp-miR-263b-5p  | Mature miRNA                    |                                              | NW_017547161.1_3196     | CTTGGCACTGGAAGAATTCACAG  | 18.2  | 0.77                   | 2.28                   |
|                  | isomiRs matching miRBase miRNAs | ame-miR-263b-5p                              | NW_017547161.1_3196.1   | CTTGGCACTGGAAGAATTCAC    | 12.6  |                        |                        |
|                  |                                 | api-miR-263b                                 | NW_017547161.1_3196.3   | CTTGGCACTGGAAGAATTCACAGA | 2.9   |                        |                        |
|                  |                                 | dpu-miR-263b                                 | NW_017547161.1_3196.2   | CTTGGCACTGGAAGAATTCACA   | 9.5   |                        |                        |
|                  |                                 | nvi-miR-263b                                 | NW_017547161.1_3196.10  | TTGGCACTGGAAGAATTCAC     | 1.3   |                        |                        |
|                  | Other isomiRs (10)              |                                              |                         |                          | 15.3  |                        |                        |
| asp-miR-252b-5p  | Mature miRNA                    |                                              | NW_017554870.1_13882    | CTAAGTAGTAGCGCCGAAGGTG   | 19.6  | 0.71                   | 1.94                   |
|                  | Most abundant isomiR            |                                              | NW_017554870.1_13882.1  | CTAAGTAGTAGCGCCGAAGG     | 9.6   |                        |                        |
|                  | Other isomiRs (13)              |                                              |                         |                          | 28.4  |                        |                        |
| asp-miR-124-3p   | Mature miRNA                    | pca-miR-124-3p                               | NW_017557672.1_14877    | TAAGGCACGCGGTGAATGCC     | 30.7  | 0.23                   | 0.80                   |
|                  | isomiRs matching miRBase miRNAs | aae-miR-124                                  | NW_017557672.1_14877.1  | TAAGGCACGCGGTGAATGC      | 10.4  |                        |                        |
|                  |                                 | api-miR-124                                  | NW_017557672.1_14877.3  | TAAGGCACGCGGTGAATGCCA    | 3.5   |                        |                        |
|                  |                                 | hme-miR-124                                  | NW_017557672.1_14877.5  | TAAGGCACGCGGTGAATGCCAA   | 1.8   |                        |                        |

| miRNA name      | Feature                         | Example of perfect Match with miRBase miRNAs | miRNA/isomiR ID        | Sequence                 | RPM  | IsomiR diversity index | IsomiR abundance index |
|-----------------|---------------------------------|----------------------------------------------|------------------------|--------------------------|------|------------------------|------------------------|
|                 | Other isomiRs (4)               |                                              |                        |                          | 8.9  |                        |                        |
| asp-miR-137-3p  | Mature miRNA                    |                                              | NW_017547181.1_4201    | TATTGCTTGAGAATACACGTA    | 13.1 | 0.23                   | 0.33                   |
|                 | Mature miRNA                    |                                              | NW_017547090.1_76      | TTTGTTTCGTTCCGGCTCGAGTT  | 16.7 |                        |                        |
| asp-miR-375-3p  | Most abundant isomiR            |                                              | NW_017547090.1_76.1    | TTTGTTTCGTTCCGGCTCGAGT   | 6.7  | 0.36                   | 1.38                   |
|                 | isomiRs matching miRBase miRNAs | ame-miR-375-3p                               | NW_017547090.1_76.3    | TTTGTTTCGTTCCGGCTCGAGTTA | 4.2  |                        |                        |
|                 | Other isomiRs (4)               |                                              |                        |                          | 12.2 |                        |                        |
| asp-miR-10-5p   | Mature miRNA                    |                                              | NW_017547290.1_7361    | TACCCTGTAGATCCGAAATT     | 22.0 | 0.18                   | 1.35                   |
|                 | Most abundant isomiR            | oar-miR-10a                                  | NW_017547290.1_7361.1  | TACCCTGTAGATCCGTAATG     | 6.0  |                        |                        |
|                 | Other isomiRs (4)               |                                              |                        |                          | 23.8 |                        |                        |
| asp-miR-996-3p  | Mature miRNA                    |                                              | NW_017553907.1_13657   | TGACTAGAGTTACACTCGTC     | 15.6 | 0.38                   | 1.45                   |
|                 | Most abundant isomiR            |                                              | NW_017553907.1_13657.1 | TGACTAGAGTTACACTCGT      | 8.7  |                        |                        |
|                 | Other isomiRs (5)               |                                              |                        |                          | 14.0 |                        |                        |
| asp-miR-3049-3p | Mature miRNA                    |                                              | NW_017547142.1_3035    | TCCGTCCAACCTCTTTCCGCC    | 12.9 | 0.00                   | 0.00                   |
|                 | Mature miRNA                    |                                              | NW_017550873.1_12017   | CTTGTCGTGTGACAGCGGC      | 11.5 |                        |                        |
| asp-miR-210-3p  | isomiRs matching miRBase miRNAs | ame-miR-210-3p                               | NW_017550873.1_12017.6 | TTGTGCGTGTGACAGCGGCTA    | 1.6  | 0.61                   | 1.44                   |
|                 |                                 | bdo-miR-210                                  | NW_017550873.1_12017.8 | TTGTGCGTGTGACAGCGGCTAT   | 1.3  |                        |                        |
|                 |                                 | bmo-miR-210                                  | NW_017550873.1_12017.1 | TTGTGCGTGTGACAGCGGCT     | 2.9  |                        |                        |
|                 |                                 | sfr-miR-210-3p                               | NW_017550873.1_12017.3 | CTTGTCGTGTGACAGCGGCT     | 2.6  |                        |                        |
|                 | Other isomiRs (3)               |                                              |                        |                          | 8.2  |                        |                        |
| asp-miR-7-5p    | Mature miRNA                    | dme-miR-7-5p                                 | NW_017556795.1_14461   | TGGAAGACTAGTGATTTTGTGT   | 7.8  | 0.90                   | 2.44                   |
|                 | isomiRs matching miRBase miRNAs | dvi-miR-7-5p                                 | NW_017556795.1_14461.5 | TGGAAGACTAGTGATTTTGTGTT  | 1.5  |                        |                        |
|                 |                                 | hme-miR-7                                    | NW_017556795.1_14461.1 | TGGAAGACTAGTGATTTTGTG    | 6.2  |                        |                        |
|                 |                                 | sfr-miR-7-5p                                 | NW_017556795.1_14461.3 | TGGAAGACTAGTGATTTTGT     | 2.2  |                        |                        |
|                 | Other isomiRs (4)               |                                              |                        |                          | 9.3  |                        |                        |
| asp-miR-1000-5p | Mature miRNA                    |                                              | NW_017547246.1_6234    | ATATTGTCCTGTACAGCAG      | 9.5  | 0.53                   | 1.82                   |
|                 | isomiRs matching miRBase miRNAs | dme-miR-1000-5p                              | NW_017547246.1_6234.1  | ATATTGTCCTGTACAGCAGT     | 9.3  |                        |                        |
|                 |                                 | dps-miR-1000-5p                              | NW_017547246.1_6234.5  | ATATTGTCCTGTACAGCAGTA    | 1.5  |                        |                        |
|                 | Other isomiRs (3)               |                                              |                        |                          | 6.5  |                        |                        |
| asp-miR-929-5p  | Mature miRNA                    | api-miR-929                                  | NW_017547330.1_8238    | AAATTGACTCTAGTAGGGAG     | 12.2 | 0.25                   | 0.66                   |
|                 | Most abundant isomiR            |                                              | NW_017547330.1_8238.1  | AAATTGACTCTAGTAGGGA      | 6.0  |                        |                        |
|                 | isomiRs matching miRBase miRNAs | ame-miR-137-3p                               | NW_017547181.1_4201.3  | TTATTGCTTGAGAATACACGTA   | 1.5  |                        |                        |
|                 | Other isomiRs (2)               |                                              |                        |                          | 3.5  |                        |                        |
| asp-miR-29b-3p  | Mature miRNA                    | tgu-miR-29b-3p                               | NW_017547261.1_6573    | TAGCACCATTGAAATCAGTG     | 6.7  | 0.59                   | 1.81                   |
|                 | Most abundant isomiR            |                                              | NW_017547261.1_6573.1  | TAGCACCATTGAAATCAG       | 5.6  |                        |                        |
|                 | isomiRs matching miRBase miRNAs | ame-miR-29b-3p                               | NW_017547261.1_6573.2  | TAGCACCATTGAAATCAGT      | 4.2  |                        |                        |
|                 | Other isomiRs (2)               |                                              |                        |                          | 2.4  |                        |                        |
| asp-miR-971b-5p | Mature miRNA                    |                                              | NW_017547177.1_3772    | CACTCTAAGCTCGAACATCAAG   | 11.6 | 0.17                   | 0.20                   |
|                 | Most abundant isomiR            |                                              | NW_017547177.1_3772.1  | CACTCTCAGCTCGAACATCAAG   | 1.5  |                        |                        |
|                 | Other isomiRs (1)               |                                              |                        |                          | 0.9  |                        |                        |
| asp-miR-307a-3p | Mature miRNA                    | dan-miR-307                                  | NW_017547096.1_364     | TCACAACCTCCTTGAGTGAG     | 4.7  | 1.06                   | 1.85                   |
|                 | Most abundant isomiR            |                                              | NW_017547096.1_364.1   | CACAACCTCCTTGAGTGAGC     | 1.6  |                        |                        |
|                 | isomiRs matching miRBase miRNAs | dvi-miR-307                                  | NW_017547096.1_364.4   | TCACAACCTCCTTGAGTGAGC    | 1.6  |                        |                        |
|                 | Other isomiRs (3)               |                                              |                        |                          | 5.5  |                        |                        |
| asp-miR-2796-3p | Mature miRNA                    |                                              | NW_017547276.1_6782    | GTAGGCCGCGCGAACTACTTG    | 4.7  | 0.63                   | 1.04                   |
|                 | Most abundant isomiR            |                                              | NW_017547276.1_6782.1  | GTAGGCCGCGCGAACTACTT     | 2.0  |                        |                        |
|                 | isomiRs matching miRBase miRNAs | ame-miR-2796-3p                              | NW_017547276.1_6782.2  | GTAGGCCGCGCGAACTACTGC    | 1.6  |                        |                        |

| miRNA name       | Feature                         | Example of perfect Match with miRBase miRNAs | miRNA/isomiR ID        | Sequence               | RPM | IsomiR diversity index | IsomiR abundance index |
|------------------|---------------------------------|----------------------------------------------|------------------------|------------------------|-----|------------------------|------------------------|
|                  | Other isomiRs (1)               |                                              |                        |                        | 1.3 |                        |                        |
|                  | Mature miRNA                    |                                              | NW_017549609.1_11445   | ACGTATACTAAATGTATCCT   | 2.6 |                        |                        |
| asp-miR-iab-4-5p | isomiRs matching miRBase miRNAs | dme-miR-965-3p                               | NW_017551483.1_12566.2 | TAAGCGTATAGCTTTTCCCCTT | 0.9 | 0                      | 0                      |
|                  |                                 | dvi-miR-965-3p                               | NW_017551483.1_12566.1 | TAAGCGTATAGCTTTTCCCCT  | 1.2 |                        |                        |
| asp-miR-965-3p   | Mature miRNA                    |                                              | NW_017551483.1_12566   | TAAGCGTATAGCTTTTCCCC   | 4.7 | 0.42                   | 0.62                   |
| asp-miR-iab-8-5p | Mature miRNA                    |                                              | NW_017549609.1_11368   | AGGAUACAUUUAGUAUACGUC  | 0.4 | 0.77                   | 0.46                   |
